# Supplementary material
Source: PubMed Central journal article supplement (PMC3094056)
Supplement: supp_00720.2010_legend.pdf [file supp_00720.2010_legend.pdf]

**Supplemental Figure legend:****Supplemental Figure: Measurements of axes and volume from 3D reconstructions of C3H/HeJ renal pelvis that contain microbubbles.**

**A, B:** 3D reconstructed images from right renal pelvis showing measurements of long axis (6.15 mm), wide axis (3.10 mm), and depth axis (2.26 mm). **C, D.** 3D reconstruction of left renal pelvis showing tracing around individual layer to generate an area (C) that can then be stacked with other layers to generate a total volume (D) (22.9 mm<sup>3</sup>).
