# Supplementary material
Source: PubMed Central journal article supplement (PMC3094056)

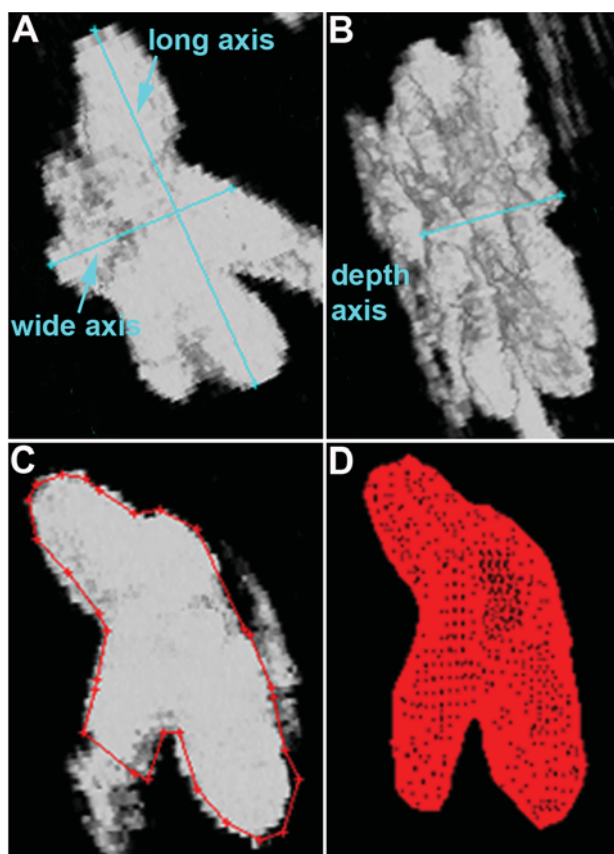

Supplement: supp_00720.2010_figS1.pdf [file supp_00720.2010_figS1.pdf]
